# Supplementary material for: Three New Polyynes from Codonopsis pilosula and Their Activities on Lipid Metabolism
Source: PubMed Central journal article supplement (PMC6017398; doi:10.3390/molecules23040887), 2018-04-12
Supplement: molecules-23-00887-s001.pdf [file molecules-23-00887-s001.pdf]

## Supplementary Materials: Three New Polyynes from *Codonopsis pilosula* and Their Activities on Lipid Metabolism

Xiao-Yu Hu, Fu-Ying Qin, Xi-Feng Lu, Lan-Sheng Zhang, and Yong-Xian Cheng

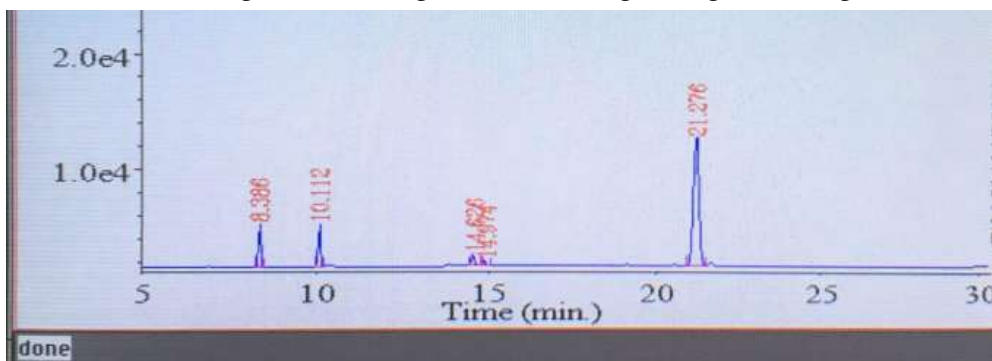

Figure S1. GC analysis of the derivative of D-glucose

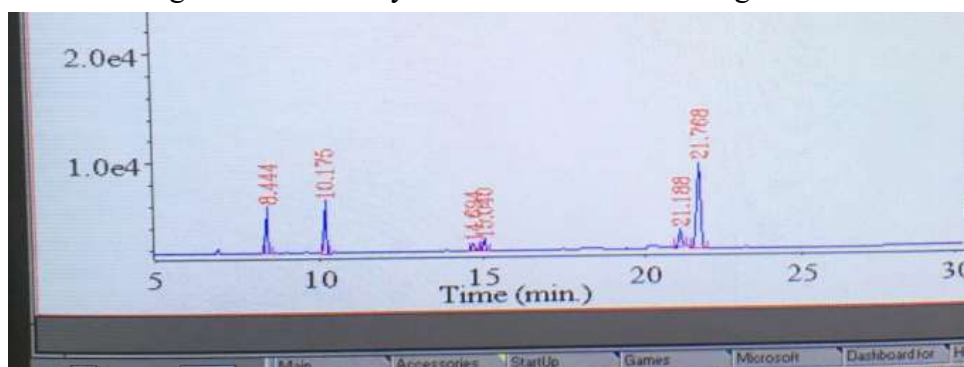

Figure S2. GC analysis of the derivative of L-glucose

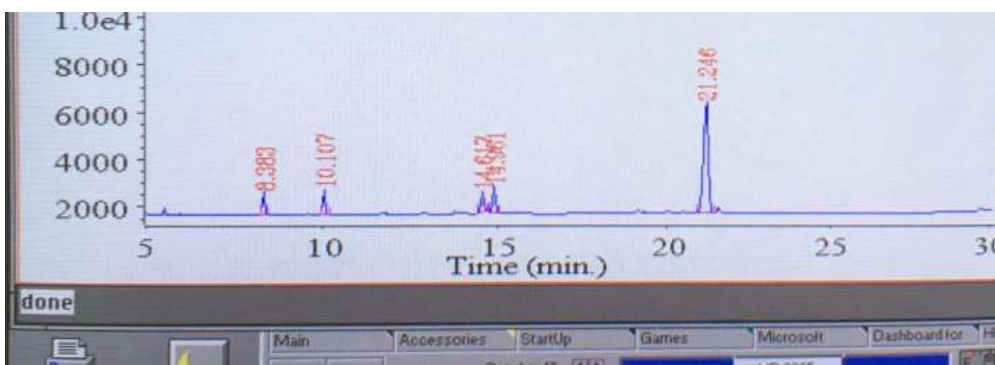

Figure S3. GC analysis of the derivative of compound 1 after hydrolysis

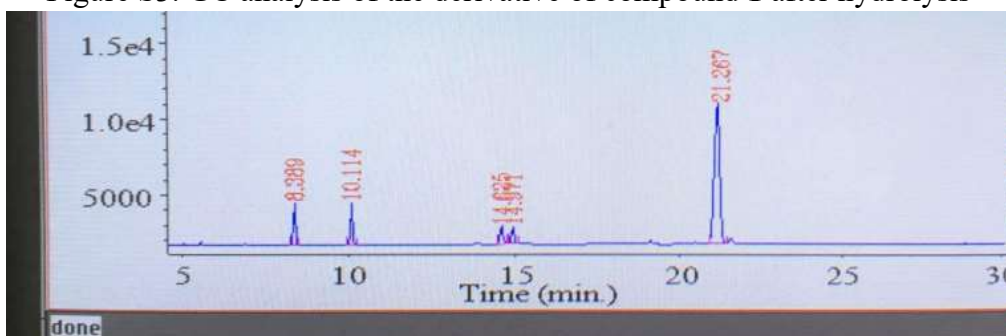

Figure S4. GC analysis of the derivative of compound 2 after hydrolysis

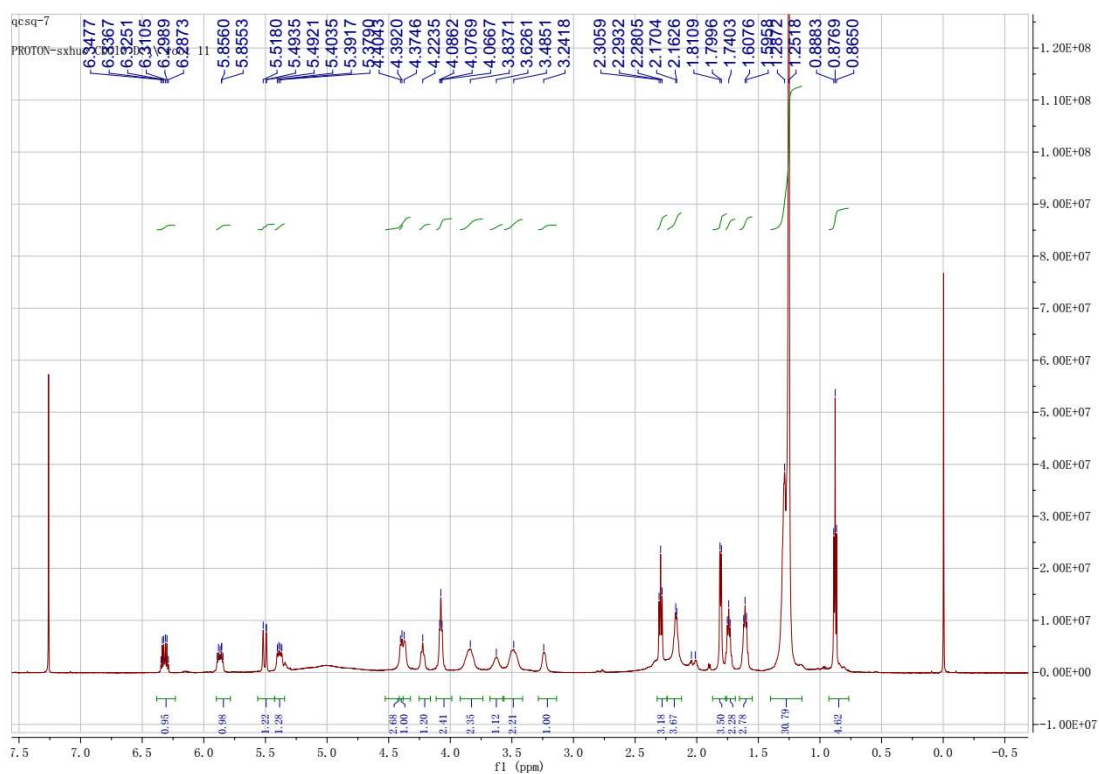

Figure S5.  $^1\text{H}$  NMR spectrum of **1** in  $\text{CDCl}_3$

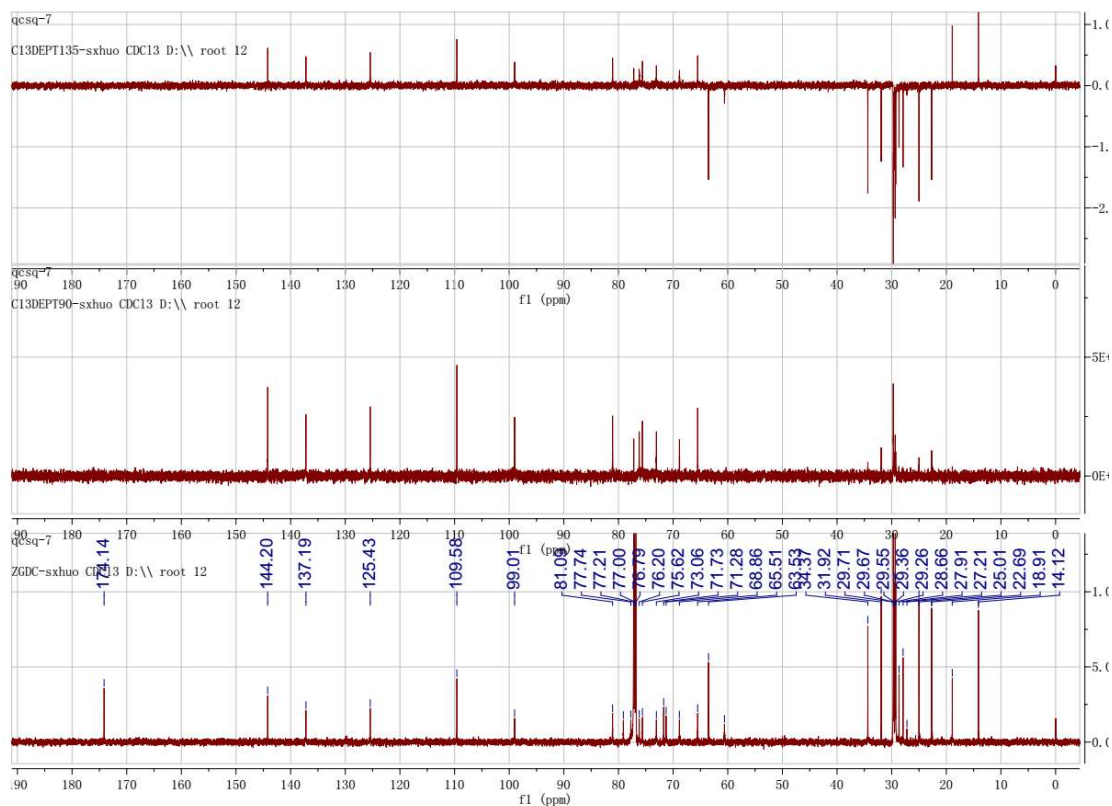

Figure S6.  $^{13}\text{C}$  NMR and DEPT spectra of **1** in  $\text{CDCl}_3$

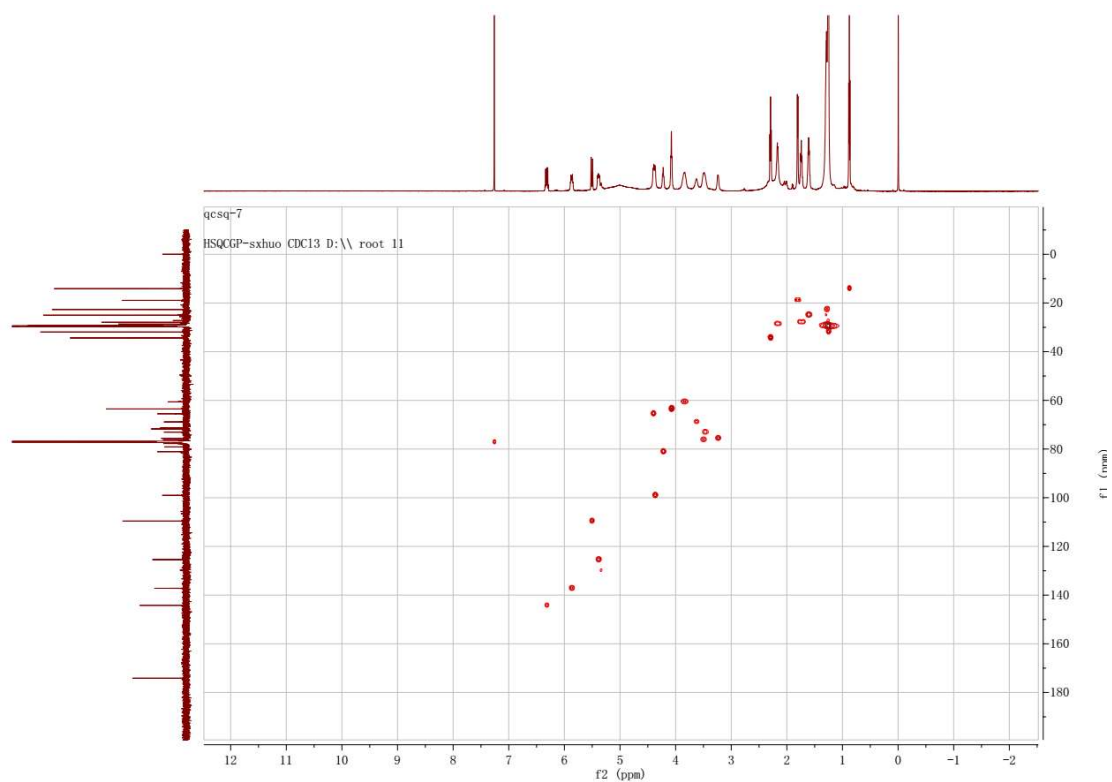

Figure S7. HSQC spectrum of **1** in  $\text{CDCl}_3$

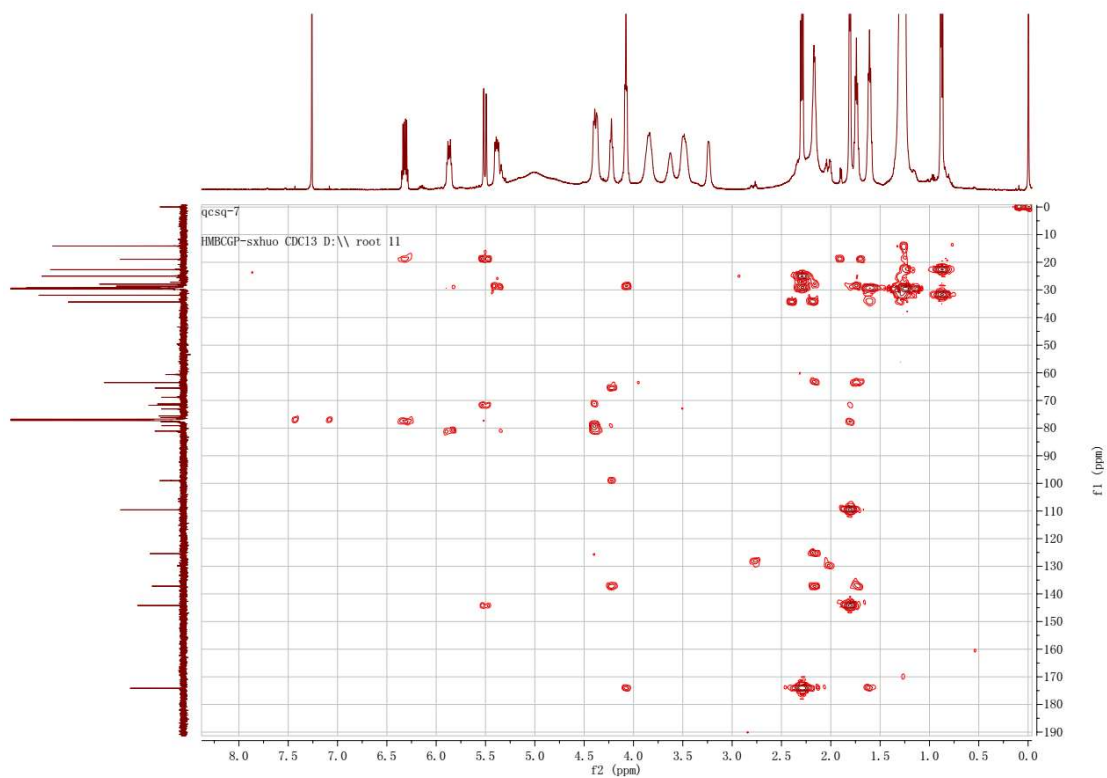

Figure S8. HMBC spectrum of **1** in  $\text{CDCl}_3$

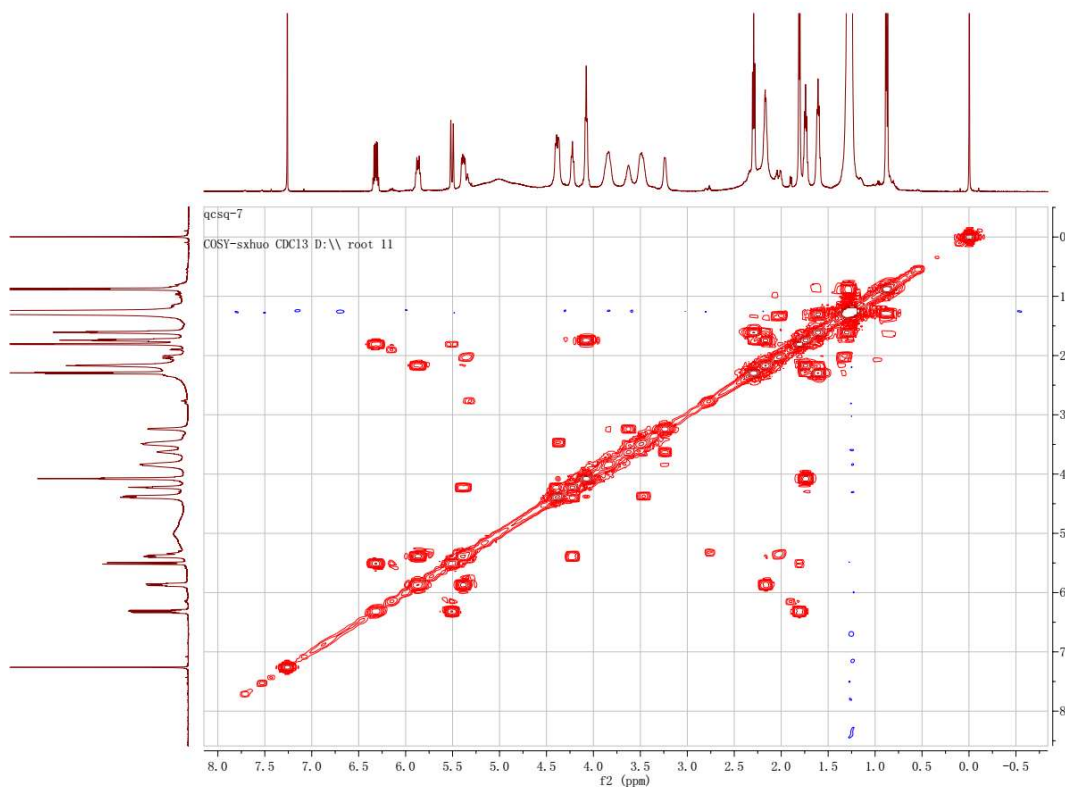

Figure S9.  $^1\text{H}$ - $^1\text{H}$  COSY spectrum of **1** in  $\text{CDCl}_3$

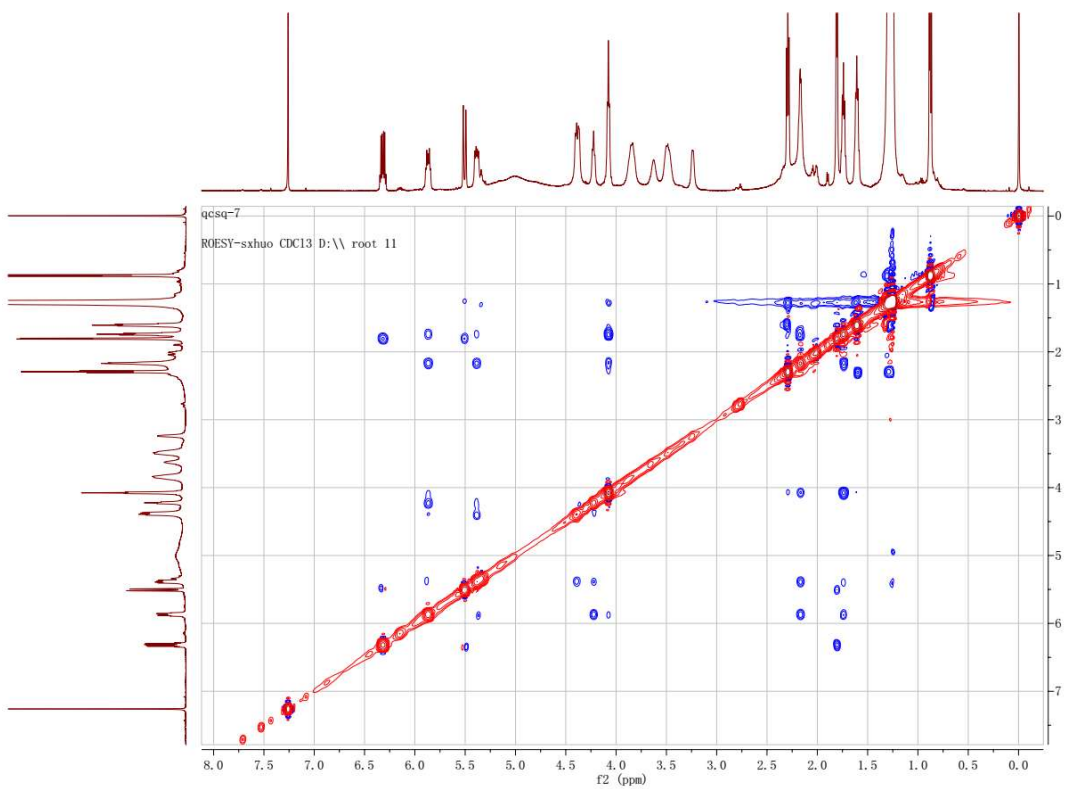

Figure S10. ROESY spectrum of **1** in  $\text{CDCl}_3$

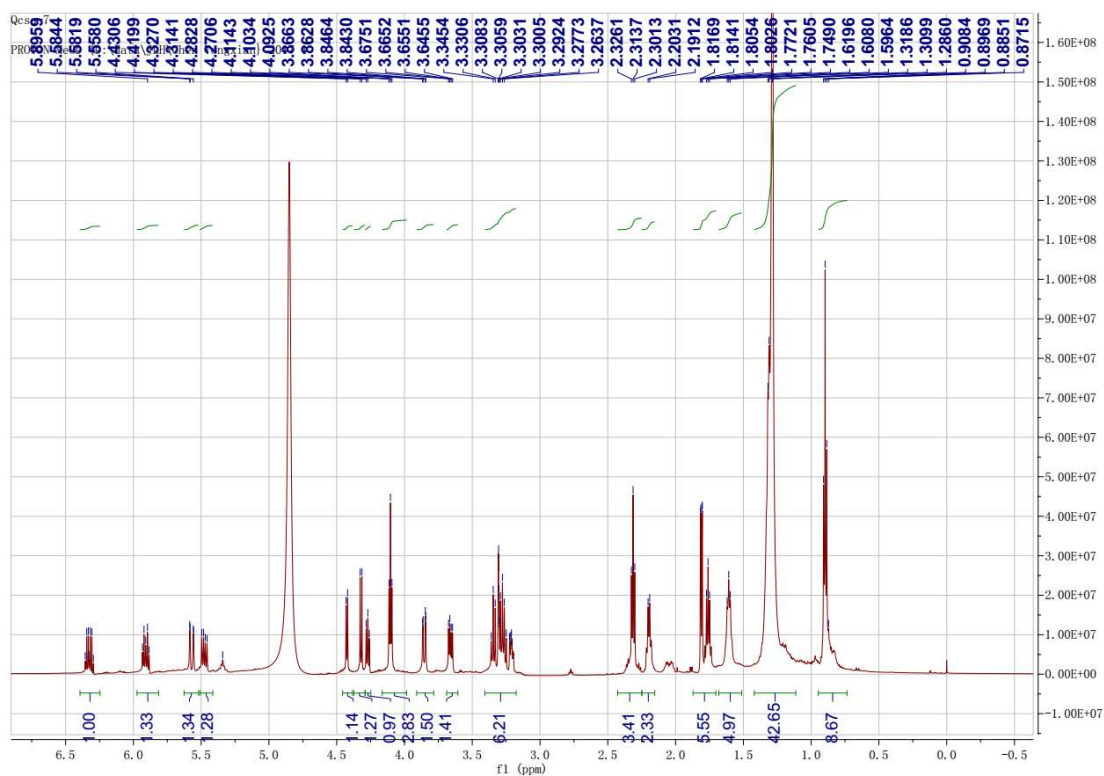

Figure S11.  $^1\text{H}$  NMR spectrum of **1** in Methanol- $d_4$

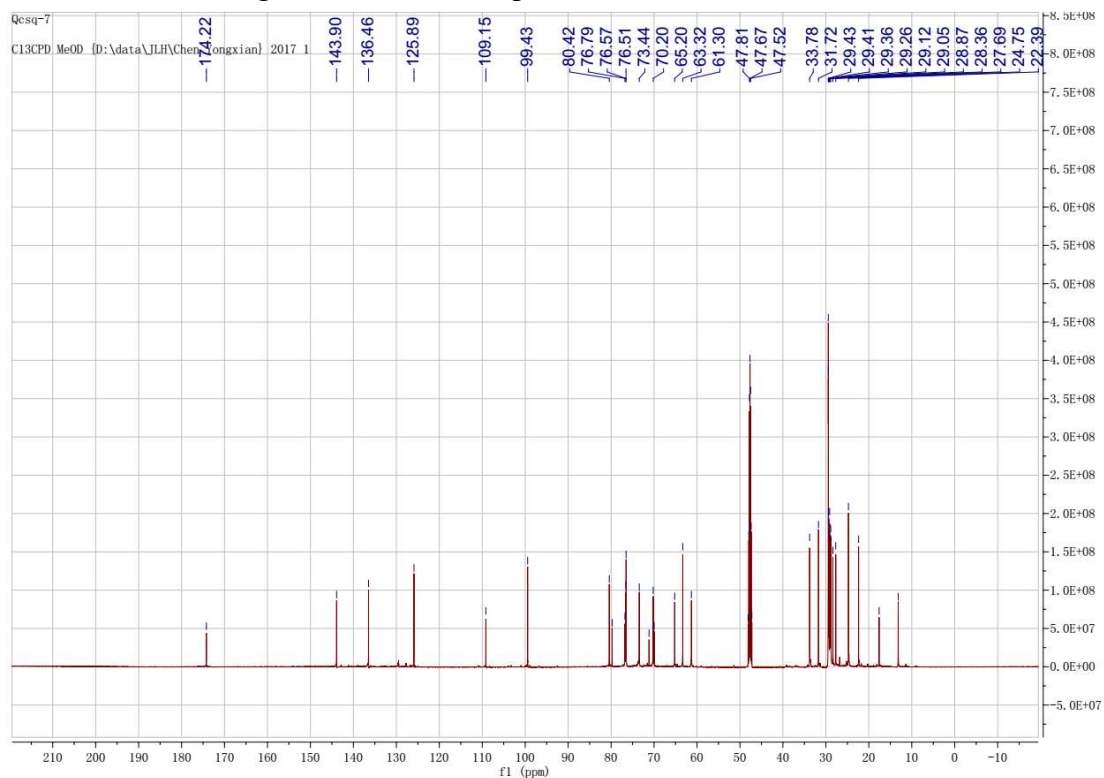

Figure S12.  $^{13}\text{C}$  NMR spectrum of **1** in Methanol- $d_4$

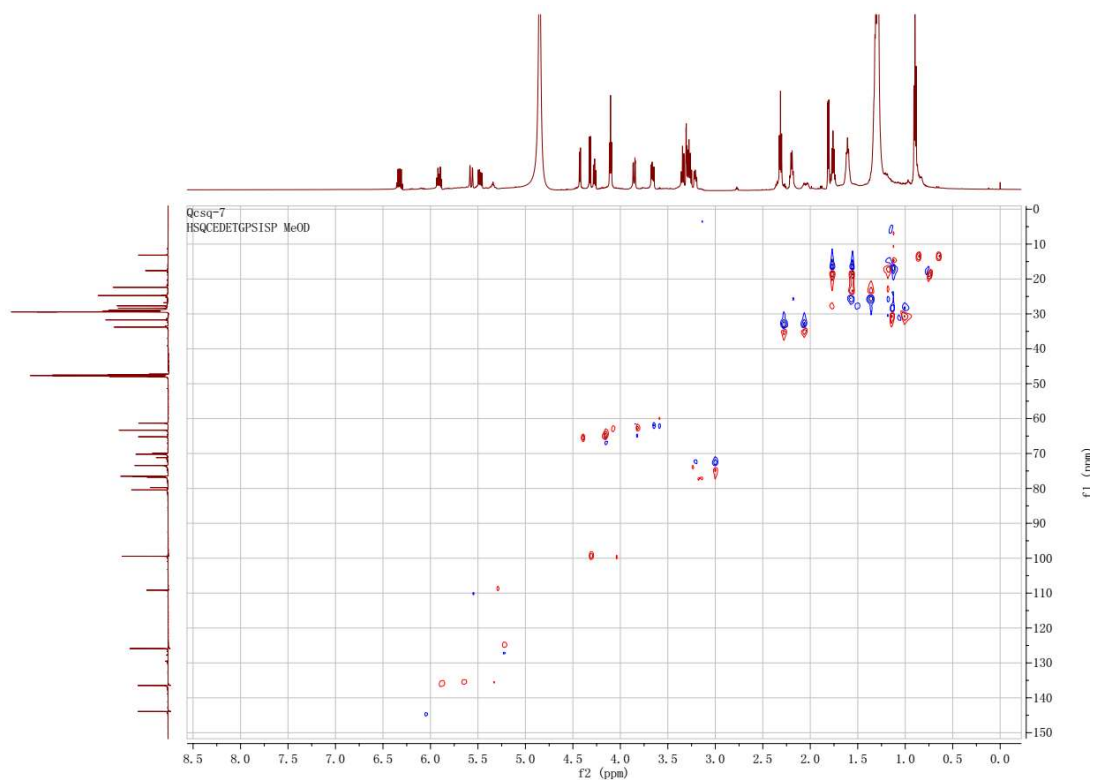

Figure S13. HSQC spectrum of **1** in Methanol- $d_4$

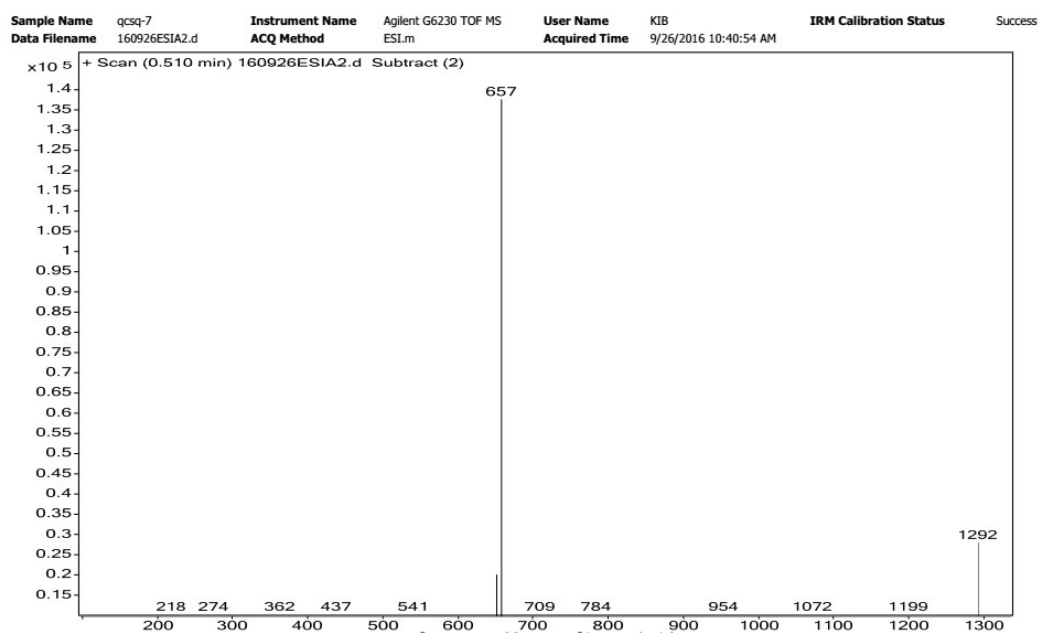

Figure S14. ESIMS of **1**

## Qualitative Analysis Report

|                               |                      |                      |                       |
|-------------------------------|----------------------|----------------------|-----------------------|
| <b>Data Filename</b>          | 160926ESIA2.d        | <b>Sample Name</b>   | qcsq-7                |
| <b>Sample Type</b>            | Sample               | <b>Position</b>      |                       |
| <b>Instrument Name</b>        | Agilent G6230 TOF MS | <b>User Name</b>     | KIB                   |
| <b>Acq Method</b>             | ESI.m                | <b>Acquired Time</b> | 9/26/2016 10:40:54 AM |
| <b>IRM Calibration Status</b> | Success              | <b>DA Method</b>     | Default.m             |
| <b>Comment</b>                |                      |                      |                       |

|                               |                                                     |              |
|-------------------------------|-----------------------------------------------------|--------------|
| <b>Sample Group</b>           |                                                     | <b>Info.</b> |
| <b>Acquisition SW Version</b> | 6200 series TOF/6500 series Q-TOF B.05.01 (B5125.2) |              |

### User Spectra

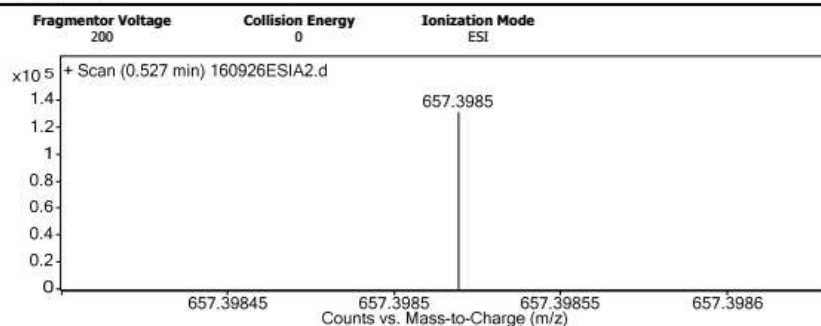

### Peak List

| <i>m/z</i> | <i>z</i> | Abund     | Formula       | Ion |
|------------|----------|-----------|---------------|-----|
| 361.1688   | 1        | 73661.73  |               |     |
| 362.1697   | 1        | 19172.02  |               |     |
| 563.2517   | 1        | 144029.48 |               |     |
| 564.2528   | 1        | 60021.64  |               |     |
| 565.2505   | 1        | 30172.1   |               |     |
| 652.4424   | 1        | 21541.73  |               |     |
| 657.3985   | 1        | 130671.76 | C36 H58 Na O9 | M+  |
| 658.4017   | 1        | 41275.9   | C36 H58 Na O9 | M+  |
| 1291.805   | 1        | 28297.47  |               |     |
| 1292.8084  | 1        | 21611.54  |               |     |

### Formula Calculator Element Limits

| Element | Min | Max |
|---------|-----|-----|
| C       | 0   | 200 |
| H       | 0   | 400 |
| O       | 0   | 12  |
| Na      | 1   | 1   |

### Formula Calculator Results

| Formula       | CalculatedMass | Mz       | Diff. (mDa) | Diff. (ppm) | DBE |
|---------------|----------------|----------|-------------|-------------|-----|
| C36 H58 Na O9 | 657.3979       | 657.3985 | -0.7        | 1.0         | 7.5 |

--- End Of Report ---

Figure S15. HRESIMS of 1

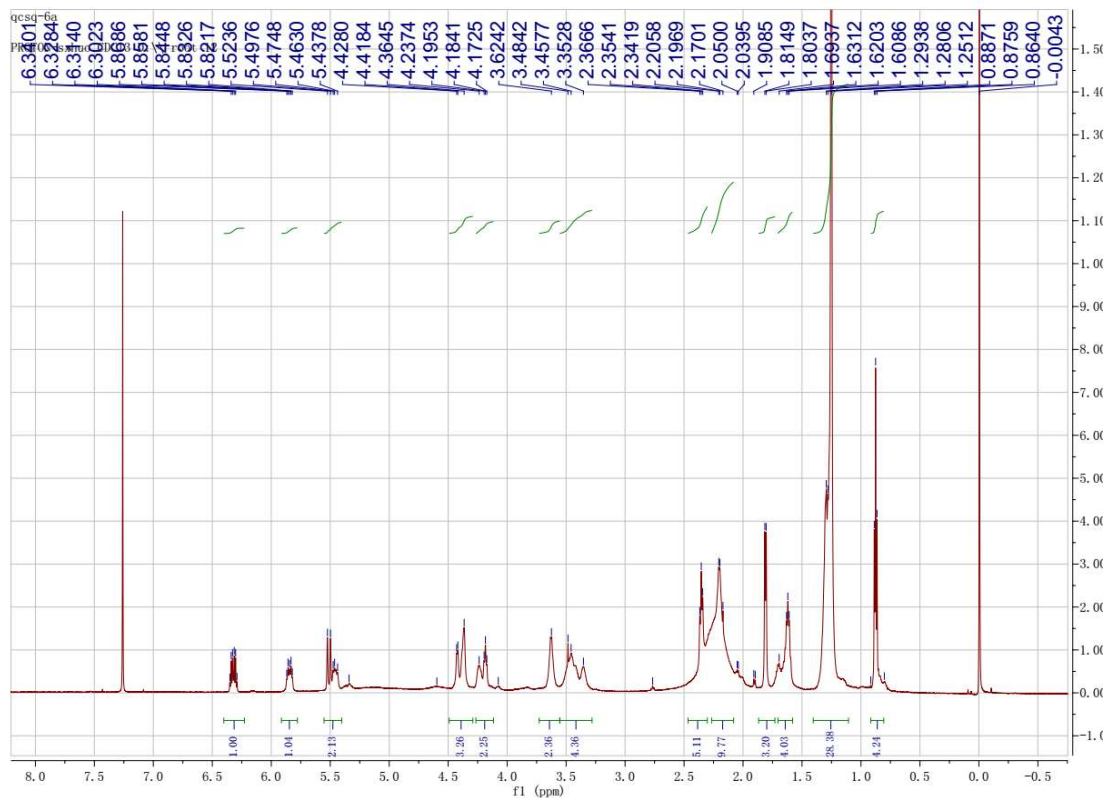

Figure S16.  $^1\text{H}$  NMR spectrum of **2** in  $\text{CDCl}_3$

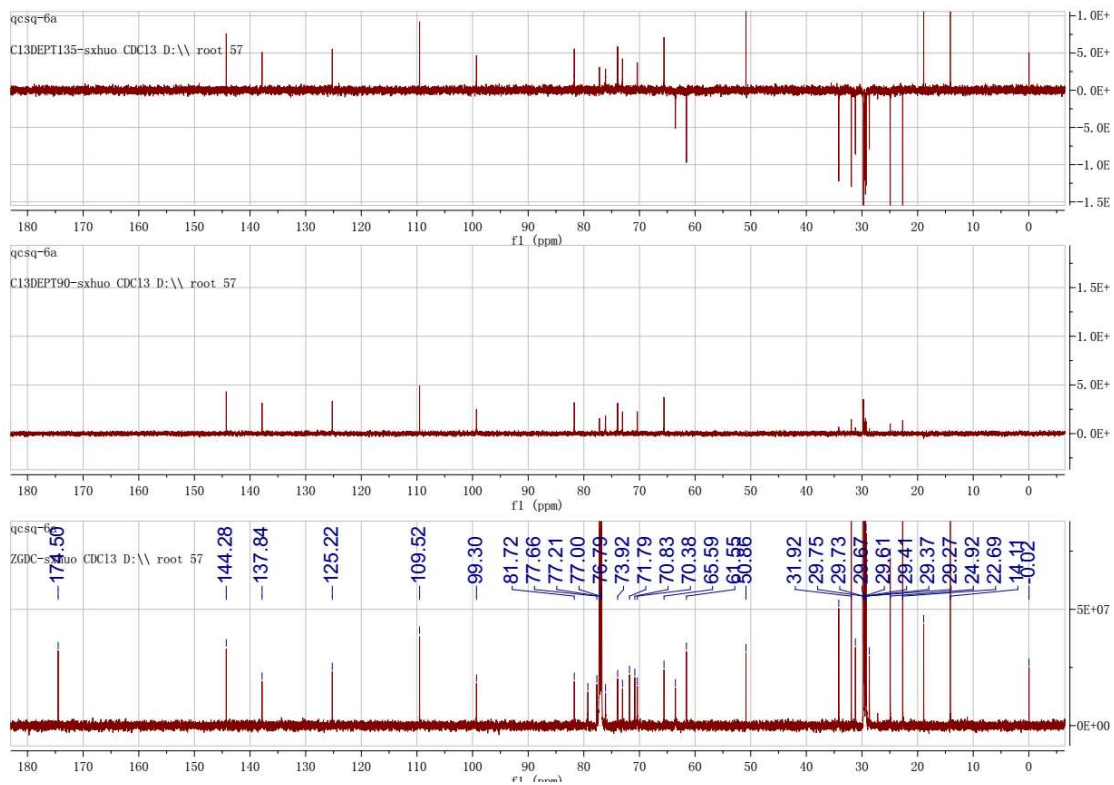

Figure S17.  $^{13}\text{C}$  NMR and DEPT spectra of **2** in  $\text{CDCl}_3$



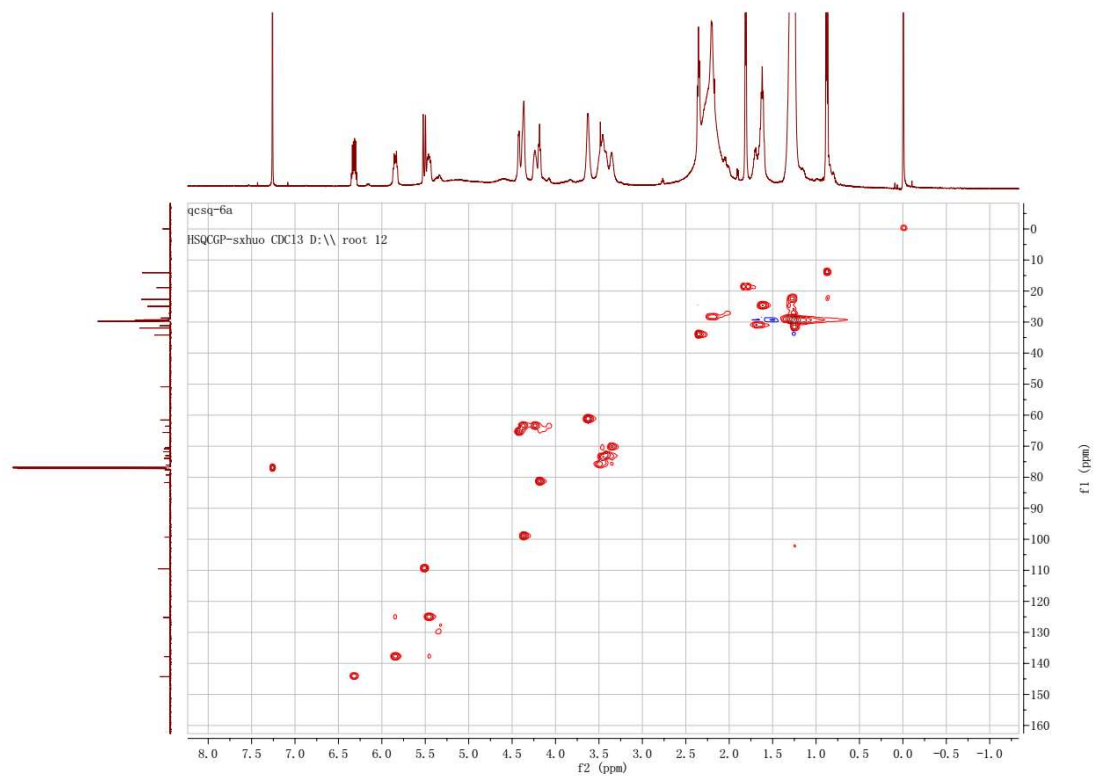

Figure S18. HSQC spectrum of **2** in CDCl<sub>3</sub>

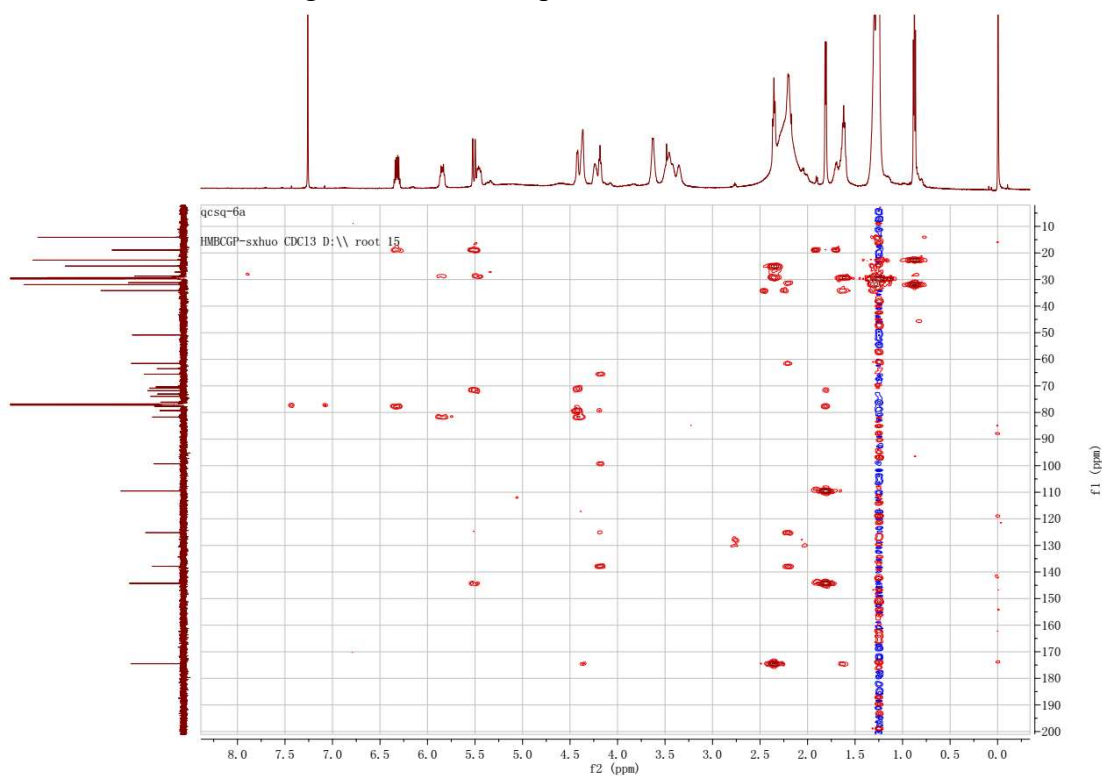

Figure S19. HMBC spectrum of **2** in CDCl<sub>3</sub>

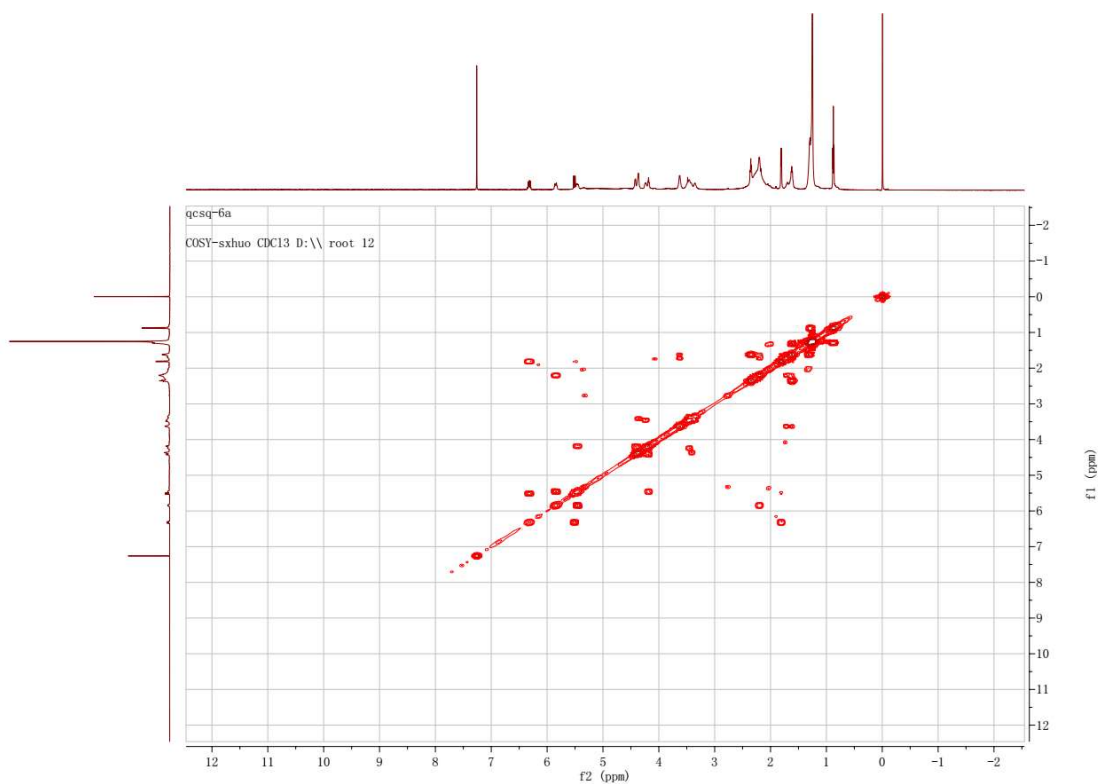

Figure S20.  $^1\text{H}$ - $^1\text{H}$  COSY spectrum of **2** in  $\text{CDCl}_3$

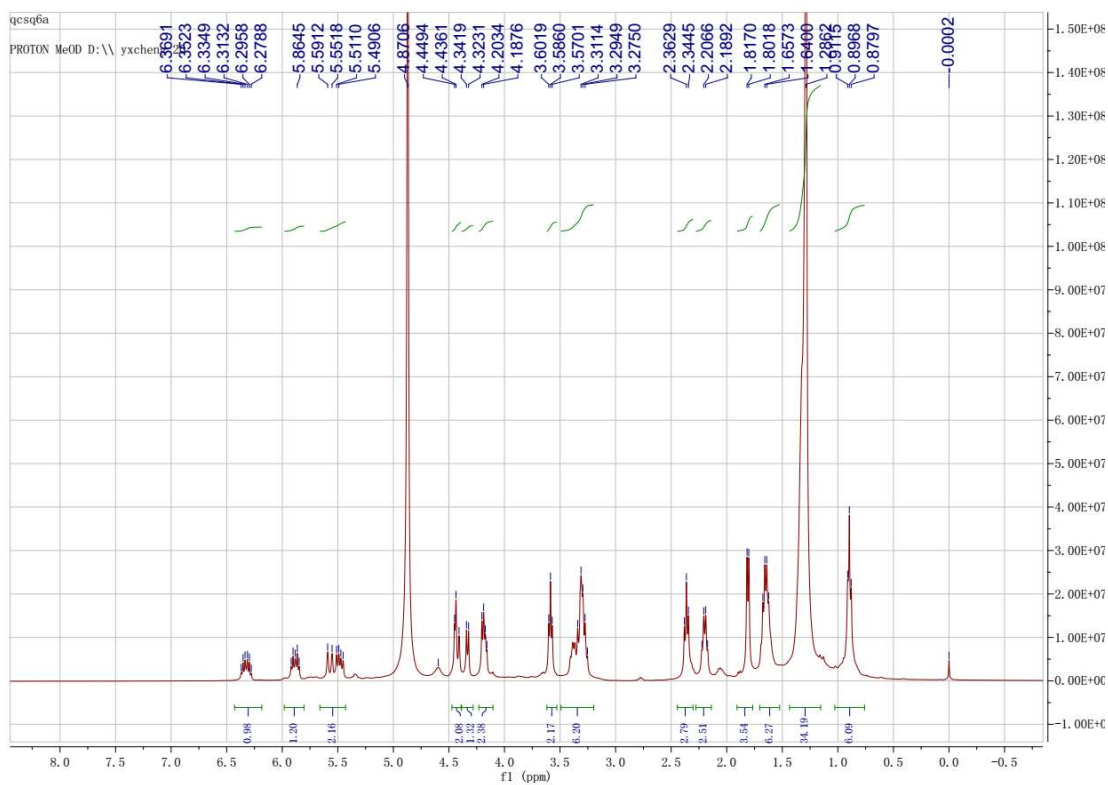

Figure S21.  $^1\text{H}$  NMR spectrum of **2** in  $\text{Methanol-}d_4$

Sample Name qcsq-6a Instrument Name Agilent G6230 TOF MS User Name KIB IRM Calibration Status Success  
Data Filename 160929ESIA2.d ACQ Method ESI.m Acquired Time 9/29/2016 10:16:33 AM

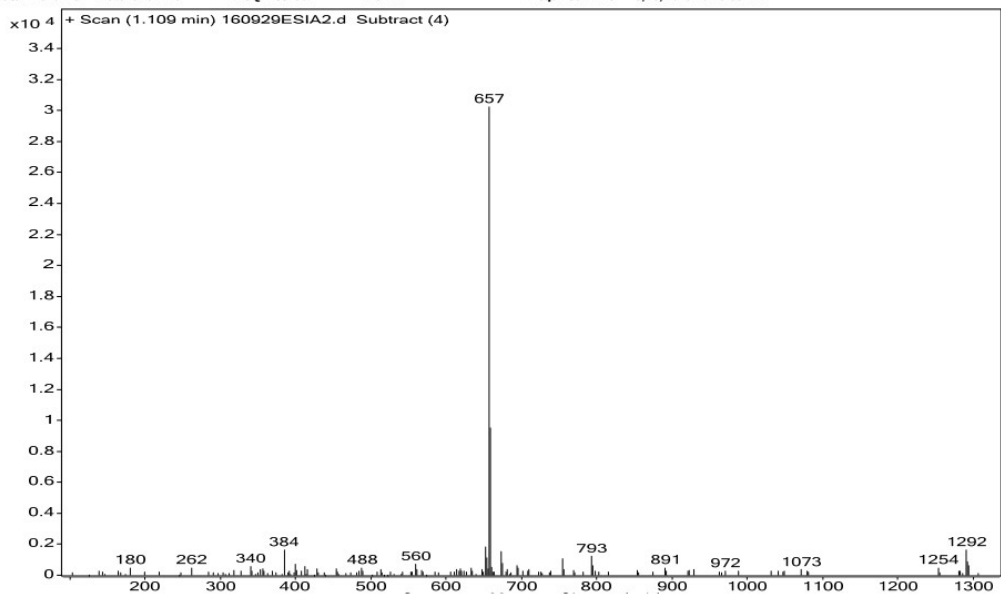

Figure S22. ESIMS of 2

**Data Filename** 160929ESIA2.d **Sample Name** qcsq-6a  
**Sample Type** Sample **Position**  
**Instrument Name** Agilent G6230 TOF MS **User Name** KIB  
**Acq Method** ESI.m **Acquired Time** 9/29/2016 10:16:33 AM  
**IRM Calibration Status** Success **DA Method** ESI.m  
**Comment**

**Sample Group** **Info.**  
**Acquisition SW** 6200 series TOF/6500 series  
**Version** Q-TOF B.05.01 (B5125.2)

### User Spectra

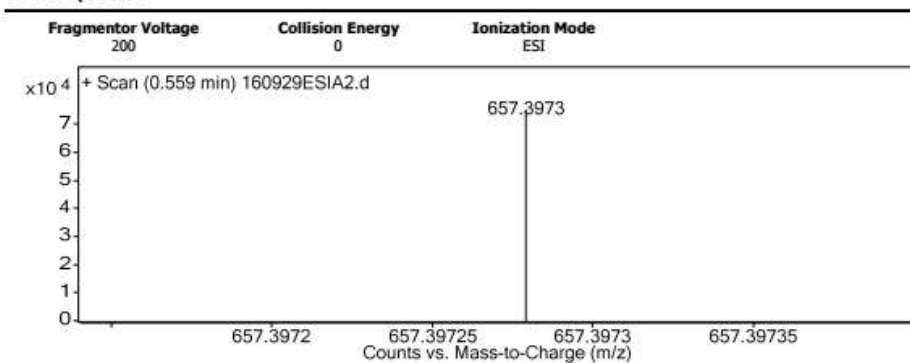

### Peak List

| m/z       | z | Abund    | Formula       | Ion |
|-----------|---|----------|---------------|-----|
| 105.0429  |   | 5809.14  |               |     |
| 121.0509  | 1 | 68802.3  |               |     |
| 274.2736  | 1 | 11898.93 |               |     |
| 318.2999  | 1 | 9733.59  |               |     |
| 657.3973  | 1 | 74909.94 | C36 H58 Na O9 | M+  |
| 658.3999  | 1 | 22984.5  | C36 H58 Na O9 | M+  |
| 922.0098  | 1 | 71542.01 |               |     |
| 923.0106  | 1 | 9845.04  |               |     |
| 1291.8023 | 1 | 12512.37 |               |     |
| 1292.8052 | 1 | 9070.89  |               |     |

### Formula Calculator Element Limits

| Element | Min | Max |
|---------|-----|-----|
| C       | 0   | 200 |
| H       | 0   | 400 |
| O       | 5   | 12  |
| Na      | 1   | 1   |

### Formula Calculator Results

| Formula       | CalculatedMass | Mz       | Diff.(mDa) | Diff. (ppm) | DBE |
|---------------|----------------|----------|------------|-------------|-----|
| C36 H58 Na O9 | 657.3979       | 657.3973 | 0.5        | 0.8         | 7.5 |

--- End Of Report ---

Figure S23. HRESIMS of 2

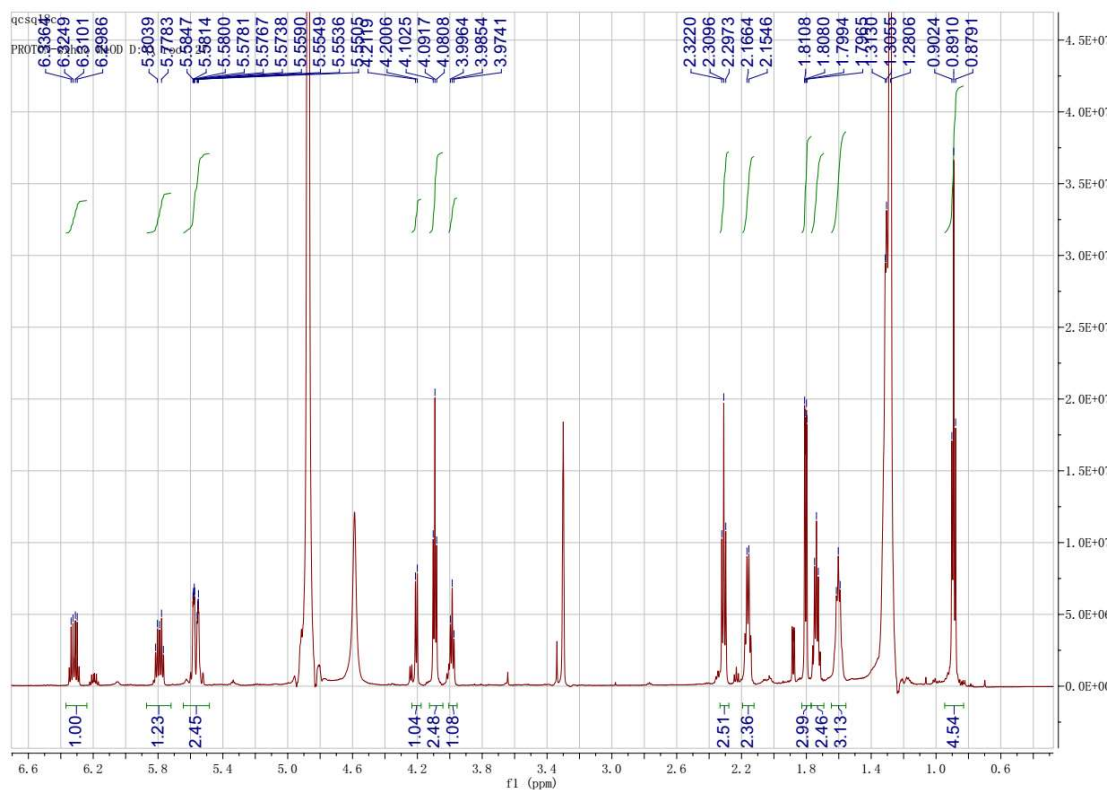

Figure S24.  $^1\text{H}$  NMR spectrum of **3** in Methanol- $d_4$

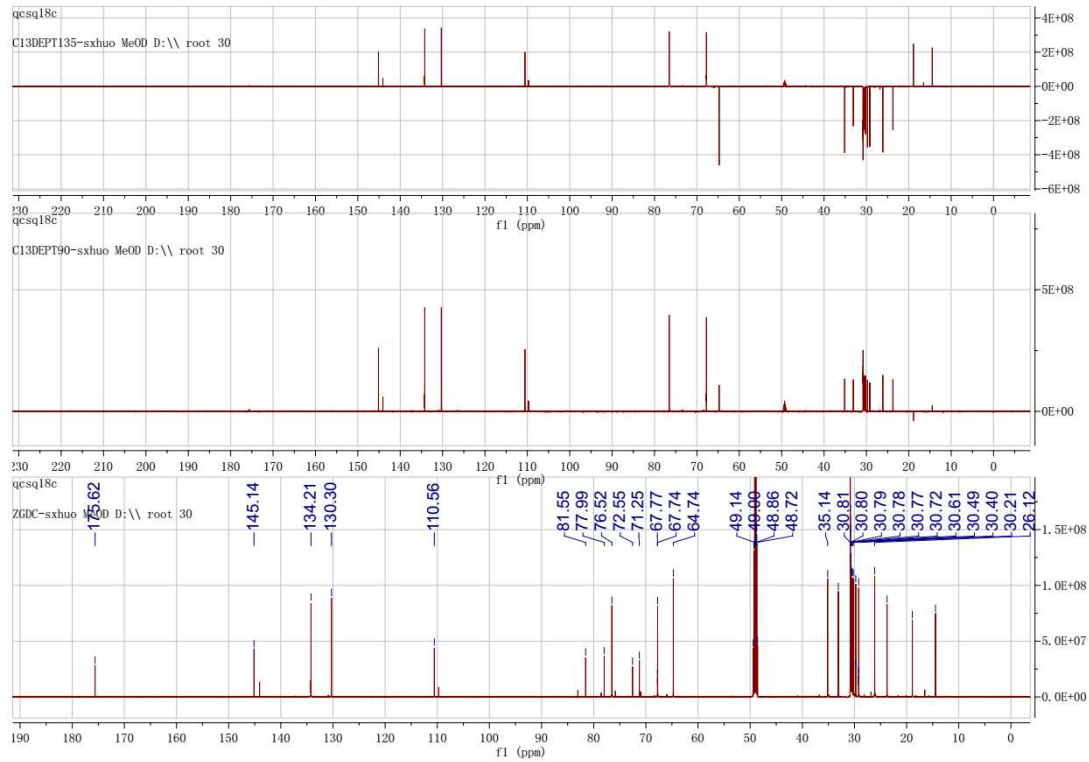

Figure S25.  $^{13}\text{C}$  NMR and DEPT spectra **3** in Methanol- $d_4$

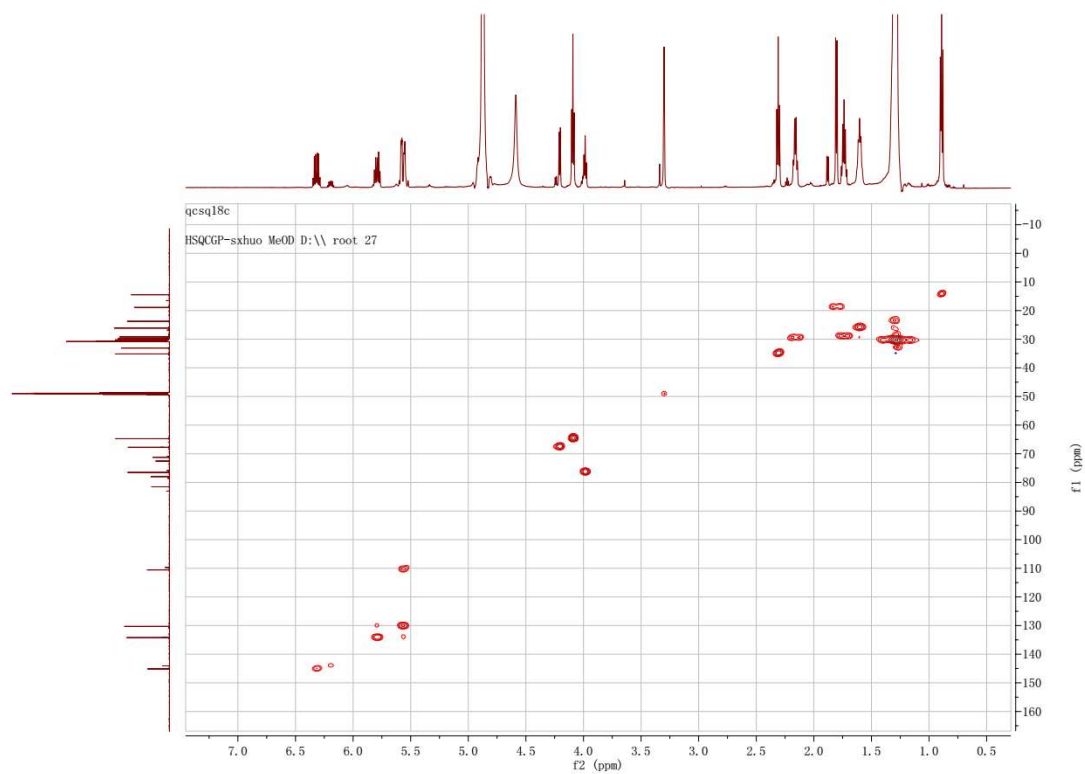

Figure S26. HSQC spectrum of **3** in Methanol- $d_4$

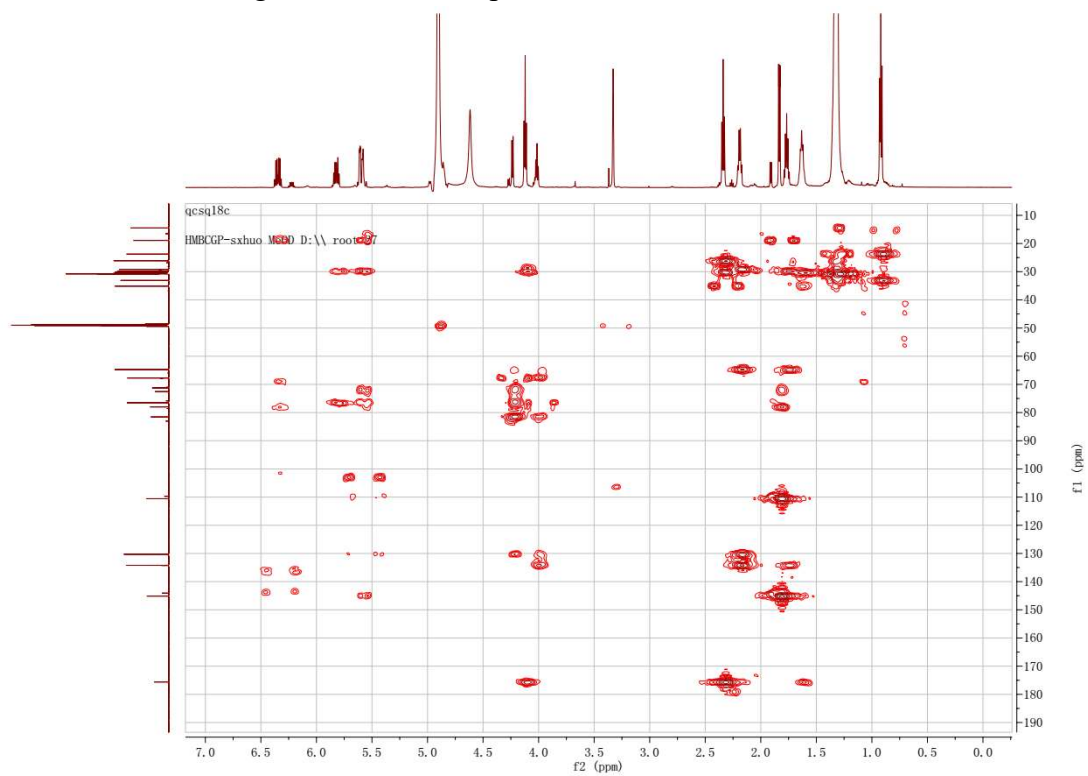

Figure S27. HMBC spectrum of **3** in Methanol- $d_4$

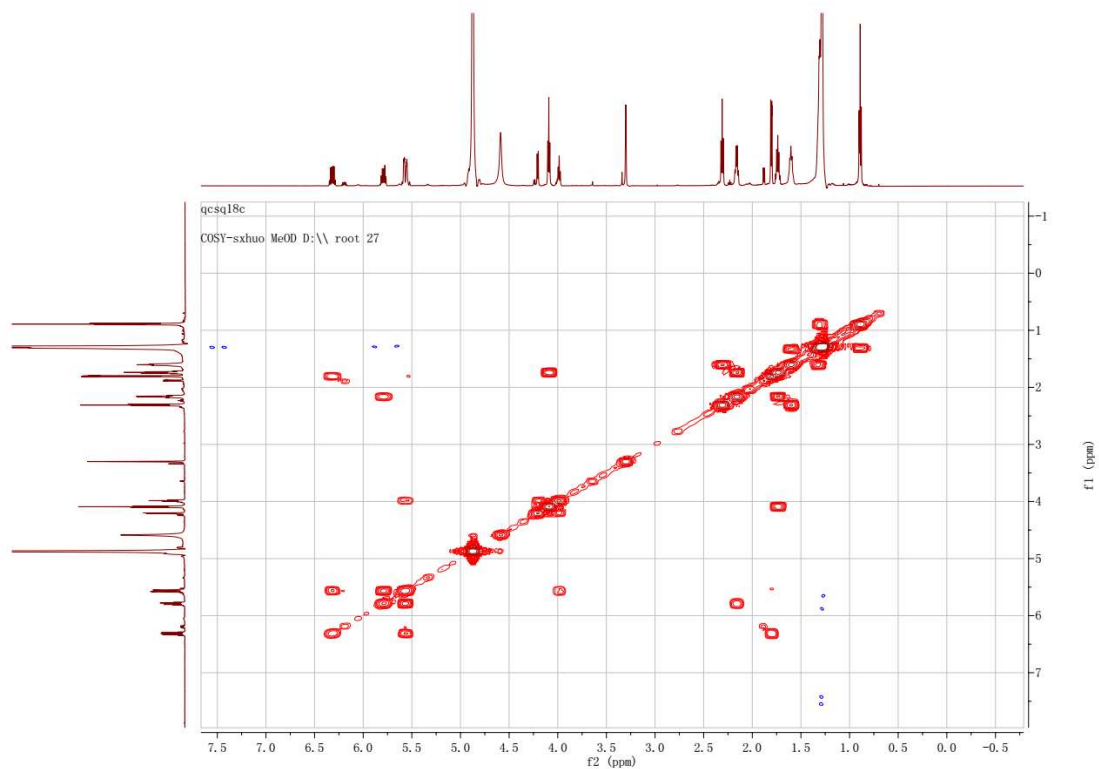

Figure S28.  $^1\text{H}$ - $^1\text{H}$  COSY spectrum of **3** in Methanol- $d_4$

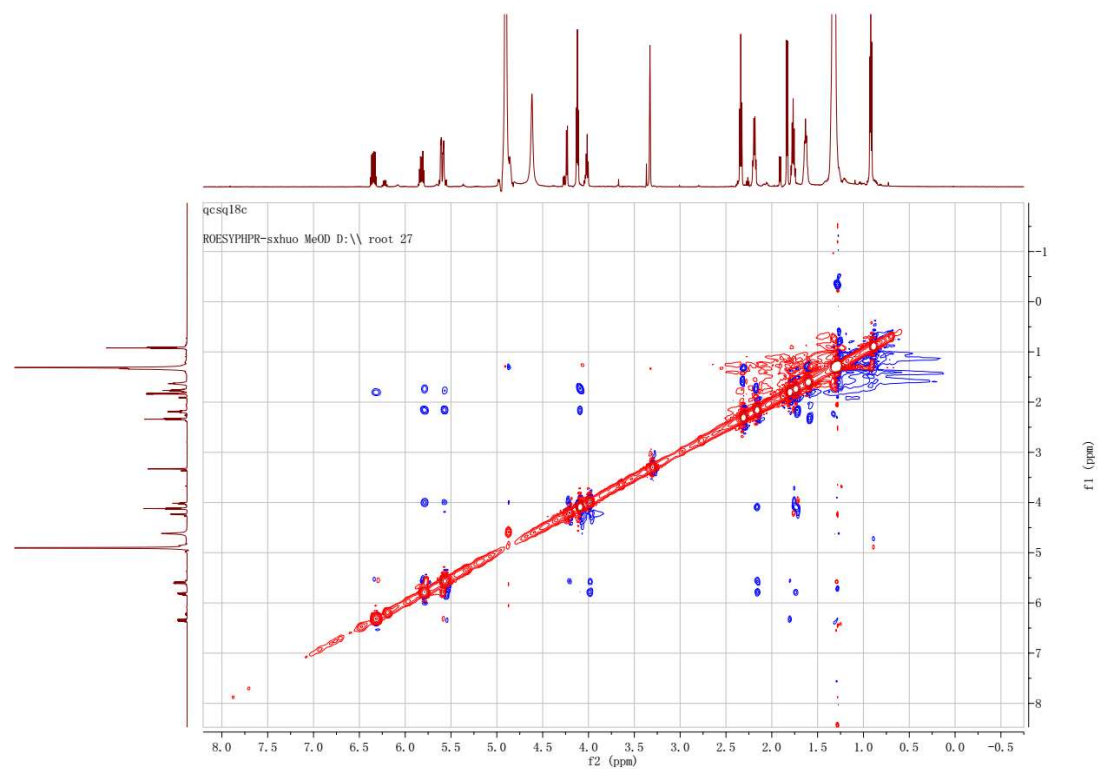

Figure S29. ROESY spectrum of **3** in Methanol- $d_4$

Sample Name qcsq18c Instrument Name Agilent G6230 TOF MS User Name KIB IRM Calibration Status Success  
Data Filename 171107ESIA21.d ACQ Method ESI.m Acquired Time 11/7/2017 3:35:46 PM

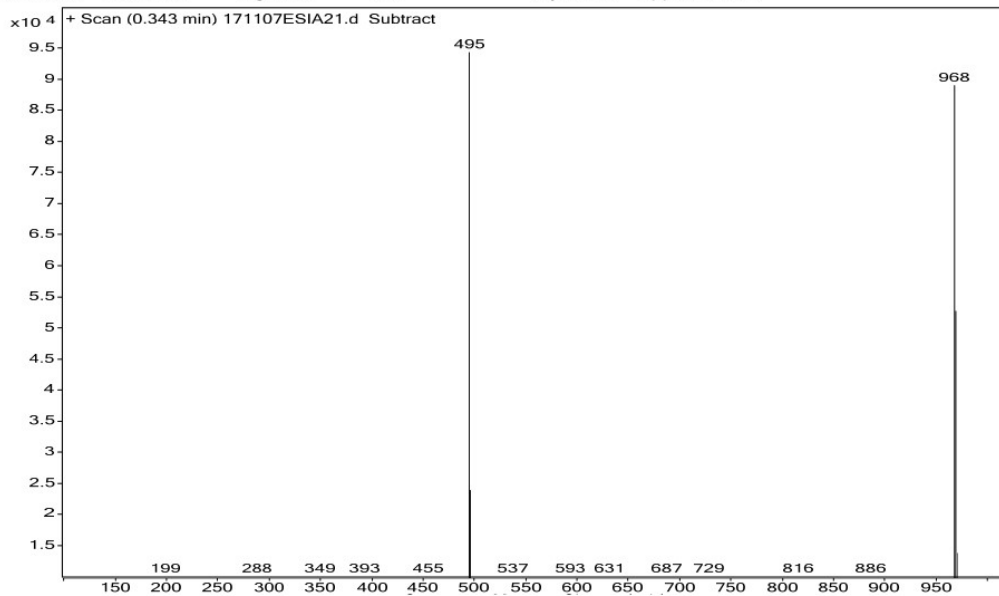

Figure S30. ESIMS of 3



## Qualitative Analysis Report

|                        |                      |               |                      |
|------------------------|----------------------|---------------|----------------------|
| Data Filename          | 171107ESIA21.d       | Sample Name   | qcsq18c              |
| Sample Type            | Sample               | Position      |                      |
| Instrument Name        | Agilent G6230 TOF MS | User Name     | KIB                  |
| Acq Method             | ESI.m                | Acquired Time | 11/7/2017 3:35:46 PM |
| IRM Calibration Status | Success              | DA Method     | ESI.m                |

|                |                             |
|----------------|-----------------------------|
| Sample Group   | Info.                       |
| Acquisition SW | 6200 series TOF/6500 series |
| Version        | Q-TOF B.05.01 (B5125.2)     |

### User Spectra

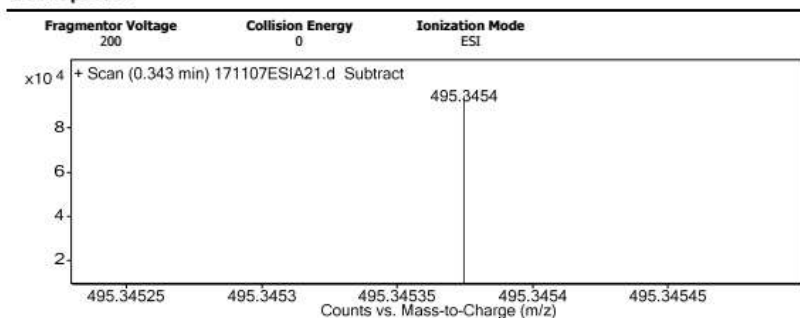

### Peak List

| m/z      | z | Abund    | Formula       | Ion |
|----------|---|----------|---------------|-----|
| 490.3881 | 1 | 2102.16  |               |     |
| 495.3454 | 1 | 94289.97 | C30 H48 Na O4 | M+  |
| 496.3482 | 1 | 23804.53 | C30 H48 Na O4 | M+  |
| 497.3512 | 1 | 3631.07  | C30 H48 Na O4 | M+  |
| 511.3185 | 1 | 3265.76  |               |     |
| 967.702  | 1 | 88980.99 |               |     |
| 968.7046 | 1 | 52654.56 |               |     |
| 969.7065 | 1 | 13719.56 |               |     |
| 970.7078 | 1 | 2324.96  |               |     |
| 983.675  | 1 | 2921     |               |     |

### Formula Calculator Element Limits

| Element | Min | Max |
|---------|-----|-----|
| C       | 0   | 200 |
| H       | 0   | 400 |
| O       | 0   | 10  |
| Na      | 1   | 1   |

### Formula Calculator Results

| Formula       | CalculatedMass | Mz       | Diff.(mDa) | Diff. (ppm) | DBE |
|---------------|----------------|----------|------------|-------------|-----|
| C30 H48 Na O4 | 495.3450       | 495.3454 | -0.4       | 0.7         | 6.5 |

--- End Of Report ---

Figure S31. HRESIMS of 3
